# Supplementary material for: The Influence of Type 1 and Type 2 Diabetes on Periodontal Disease Progression: Prospective results from the Study of Health in Pomerania (SHIP)
Source: PubMed Central journal article supplement — Diabetes Care. 2012 Sep 11;35(10):2036–42. doi: 10.2337/dc11-2453 (PMC3447825; doi:10.2337/dc11-2453), 2012-09-11

SUPPLEMENTARY DATA

**Supplementary Table 1.** General Characteristics of Participants According to Baseline Diabetes Status: Study of Health in Pomerania, 1997 – 2006.

|                                                             | No Diabetes<br>(n=2280) | Incident T2 Diabetes<br>(n=79) | T2 Diabetes, controlled<br>(n=80) | T2 Diabetes, uncontrolled<br>(n=72) | T1 Diabetes, controlled<br>(n=43) | T1 Diabetes, uncontrolled<br>(n=72) | P-value* |
|-------------------------------------------------------------|-------------------------|--------------------------------|-----------------------------------|-------------------------------------|-----------------------------------|-------------------------------------|----------|
| Age (years)                                                 | 44±14                   | 57±12                          | 61±10                             | 58±10                               | 39±13                             | 40±13                               | <0.0001  |
| Female (vs. Male)                                           | 54%                     | 38%                            | 39%                               | 32%                                 | 49%                               | 51%                                 | <0.0001  |
| Rural (vs. Urban)                                           | 39%                     | 32%                            | 46%                               | 44%                                 | 56%                               | 53%                                 | 0.01     |
| Low Education (<10 yrs)                                     | 25%                     | 48%                            | 56%                               | 61%                                 | 11%                               | 26%                                 |          |
| Intermediate Education (10 yrs)                             | 54%                     | 41%                            | 30%                               | 22%                                 | 56%                               | 61%                                 |          |
| High Education (>10 yrs)                                    | 21%                     | 11%                            | 14%                               | 17%                                 | 33%                               | 13%                                 | <0.0001  |
| Current Smoker                                              | 26%                     | 27%                            | 19%                               | 11%                                 | 37%                               | 39%                                 |          |
| Former Smoker                                               | 33%                     | 34%                            | 45%                               | 47%                                 | 28%                               | 25%                                 |          |
| Never Smoker                                                | 59%                     | 61%                            | 64%                               | 58%                                 | 65%                               | 64%                                 | 0.004    |
| Physician visit in previous year                            | 81%                     | 84%                            | 86%                               | 85%                                 | 81%                               | 74%                                 | 0.43     |
| Dentist visit in previous year                              | 93%                     | 87%                            | 95%                               | 93%                                 | 93%                               | 89%                                 | 0.28     |
| HbA1c (%)                                                   | 5.16±0.52               | 5.83±0.46                      | 6.15±0.73                         | 8.32±1.14                           | 6.24±0.56                         | 8.33±1.21                           | <0.0001  |
| Δ-HbA1c (%)                                                 | -0.00±0.52              | 0.94±1.17                      | 0.14±0.97                         | -0.86±1.71                          | 0.60±1.41                         | -0.40±0.71                          | <0.0001  |
| Mean PD (mm)                                                | 2.40±0.61               | 2.75±0.82                      | 2.65±0.68                         | 2.88±0.85                           | 2.35±0.75                         | 2.54±0.67                           | <0.0001  |
| Mean AL (mm)                                                | 2.27±1.55               | 3.46±1.67                      | 3.66±1.69                         | 3.83±1.92                           | 2.17±1.56                         | 2.48±1.80                           | <0.0001  |
| %AL≥5 mm (%)                                                | 13±22                   | 27±27                          | 30±29                             | 34±32                               | 12±21                             | 15±24                               | <0.0001  |
| Moderate Periodontitis**                                    | 35%                     | 39%                            | 49%                               | 43%                                 | 26%                               | 32%                                 |          |
| Severe Periodontitis**                                      | 16%                     | 32%                            | 34%                               | 38%                                 | 23%                               | 21%                                 | <0.0001  |
| Baseline Tooth Count                                        | 22±0.1                  | 19±0.7                         | 19±0.7                            | 17±0.7                              | 24±0.9                            | 21±0.7                              | <0.0001  |
| Incident Tooth loss                                         | 0.7±1.5                 | 1.4±2.3                        | 1.16±1.7                          | 1.8±2.4                             | 0.88±2.2                          | 2.0±3.3                             | <0.0001  |
| Systolic blood pressure (mmHg)                              | 132±19                  | 148±24                         | 149±20                            | 151±20                              | 126±15                            | 132±21                              | <0.0001  |
| Waist-to-hip ratio                                          | 0.85±0.09               | 0.93±0.07                      | 0.91±0.08                         | 0.94±0.09                           | 0.83±0.09                         | 0.85±0.09                           | <0.0001  |
| BMI (kg/m <sup>2</sup> )                                    | 26.5±4.4                | 31.4±4.8                       | 30.1±4.2                          | 31.1±5.1                            | 25.9±4.5                          | 26.5±4.6                            | <0.0001  |
| hs-CRP (mg/L)                                               | 2.38±4.2                | 3.76±4.39                      | 3.25±5.12                         | 3.63±4.16                           | 3.32±1.77                         | 3.90±3.78                           | 0.0001   |
| White Blood Cell Count                                      | 6.6±0.04                | 6.8±0.21                       | 6.7±0.21                          | 7.0±0.22                            | 6.8±0.29                          | 7.2±0.22                            | 0.05     |
| Urinary deoxyypyridinoline excretion (nmol/mmol creatinine) | 5.4±0.06                | 6.3±0.3                        | 5.4±0.3                           | 5.3±0.3                             | NA                                | NA                                  | 0.03     |

SUPPLEMENTARY DATA

|                              |    |    |     |     |      |      |  |
|------------------------------|----|----|-----|-----|------|------|--|
| Medication use               |    |    |     |     |      |      |  |
| Insulin                      | NA | NA | 8%  | 28% | 100% | 100% |  |
| Glucose Lowering Medications | NA | NA | 34% | 40% | 0%   | 0%   |  |
| Biguanides                   | NA | NA | 24% | 25% | 0%   | 0%   |  |
| Sulfonamides                 | NA | NA | 18% | 25% | 0%   | 0%   |  |

\* p for any difference arising from ANOVA for continuous variables (5 d.f.) and Chi-Square test for categorical variables.

\*\* Periodontitis defined according to the joint CDC/AAP case definition<sup>29</sup>

Controlled diabetes defined as HbA1c < 7.0%

SUPPLEMENTARY DATA

**Supplementary Table 2.** Mean baseline probing depth and attachment loss levels according to diabetes and tooth loss status during five-year follow-up. Study of Health in Pomerania, 1997 – 2006.

|                              | Longitudinal tooth status |             | P-value* |
|------------------------------|---------------------------|-------------|----------|
|                              | Retained                  | Lost        |          |
| Diabetes Free                |                           |             |          |
| Mean CAL, mm                 | 1.90 ± 1.54               | 4.75 ± 2.52 | <0.001   |
| Mean PD, mm                  | 2.29 ± 0.70               | 3.41 ± 1.36 | <0.001   |
| Incident Type 2 Diabetes     |                           |             |          |
| Mean CAL, mm                 | 2.98 ± 1.69               | 5.42 ± 1.97 | <0.001   |
| Mean PD, mm                  | 2.55 ± 0.84               | 3.65 ± 1.41 | <0.001   |
| Controlled Type 2 Diabetes   |                           |             |          |
| Mean CAL, mm                 | 3.22 ± 1.64               | 5.48 ± 1.65 | <0.001   |
| Mean PD, mm                  | 2.54 ± 0.79               | 3.46 ± 1.00 | 0.005    |
| Uncontrolled Type 2 Diabetes |                           |             |          |
| Mean CAL, mm                 | 3.07 ± 1.81               | 6.53 ± 2.49 | <0.001   |
| Mean PD, mm                  | 2.61 ± 0.80               | 4.07 ± 1.38 | <0.001   |
| Controlled Type 1 Diabetes   |                           |             |          |
| Mean CAL, mm                 | 1.93 ± 1.68               | 5.74 ± 2.54 | <0.001   |
| Mean PD, mm                  | 2.24 ± 0.78               | 4.22 ± 2.14 | <0.001   |
| Uncontrolled Type 1 Diabetes |                           |             |          |
| Mean CAL, mm                 | 1.89 ± 1.53               | 3.73 ± 1.70 | <0.001   |
| Mean PD, mm                  | 2.36 ± 0.69               | 2.91 ± 0.90 | <0.001   |

Multilevel linear regression, crude.

SUPPLEMENTARY DATA

**Supplementary Figure 1.** Distribution of Baseline Diabetes Medications among Patients with Controlled (A) and Uncontrolled (B) Type 2 Diabetes Mellitus in the Study of Health in Pomerania (SHIP). N=80 patients had controlled T2DM and n=72 had uncontrolled T2DM.

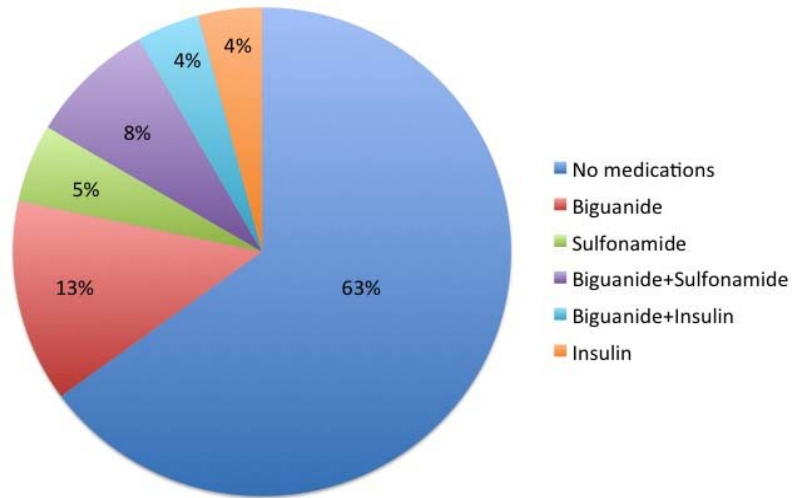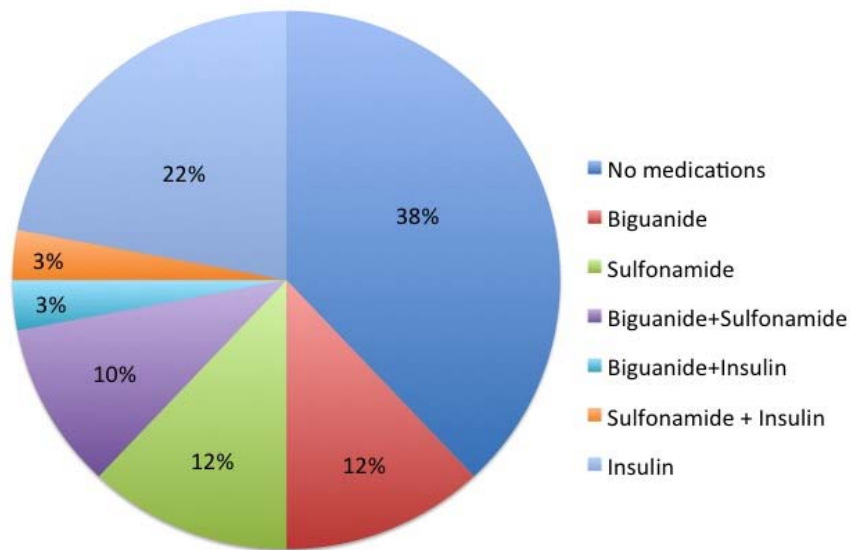

SUPPLEMENTARY DATA

**Supplementary Figure 2.** Risk Ratios and 95% confidence intervals for losing more than 1 tooth during five years of follow-up in the Study of Health in Pomerania (SHIP). Adjusted for age, gender, smoking, waist-to-hip ratio and education. Risk ratios were calculated using Poisson regression with a robust error variance<sup>20</sup>.

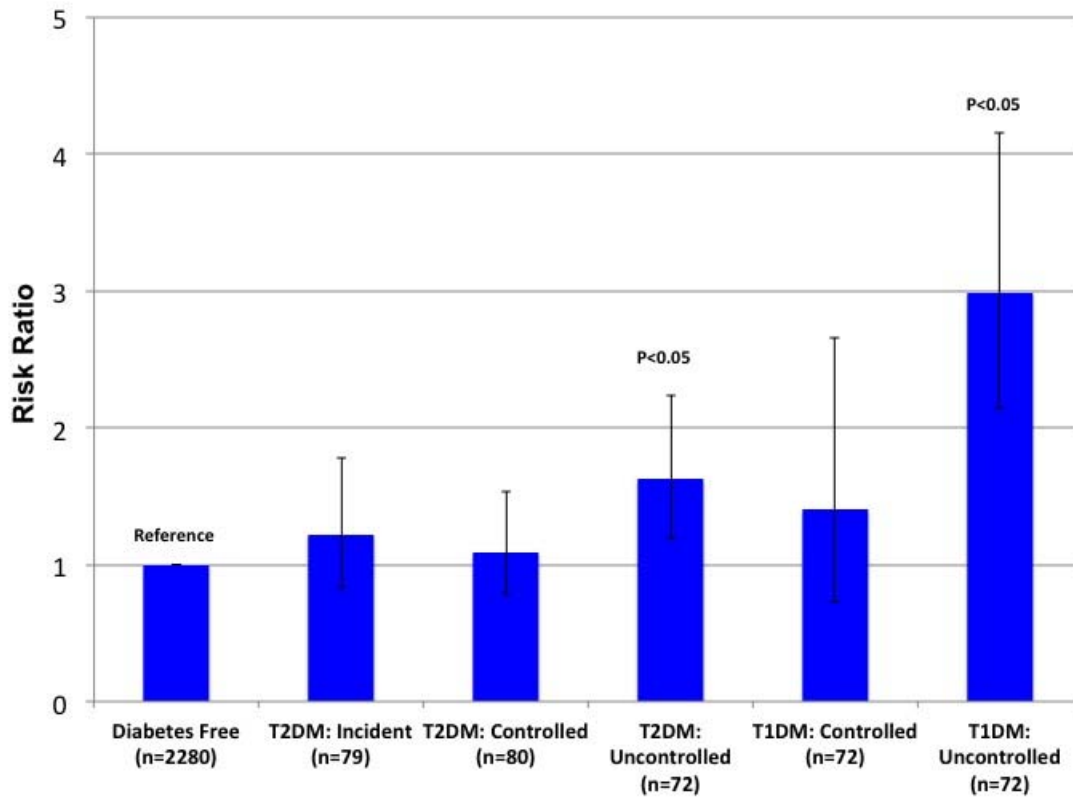

Supplement: supp_dc11-2453v112453_DC112453SupplementaryData.pdf [file supp_dc11-2453v112453_DC112453SupplementaryData.pdf]
